# Supplementary material for: A comparative evaluation of the strengths and potential caveats of the microglial inducible CreER mouse models
Source: PubMed Central journal article supplement — Cell Rep. Author manuscript; Available in PMC 2024 Feb 18. (PMC10874587; doi:10.1016/j.celrep.2023.113660), 2024-01-12
Supplement: NIHMS1961515-supplement-1.pdf [file NIHMS1961515-supplement-1.pdf]

**Cell Reports, Volume 43**

**Supplemental information**

**A comparative evaluation of the strengths and potential  
caveats of the microglial inducible CreER mouse models**

**Alicia M. Bedolla, Gabriel L. McKinsey, Kierra Ware, Nicolas Santander, Thomas D. Arnold, and Yu Luo**



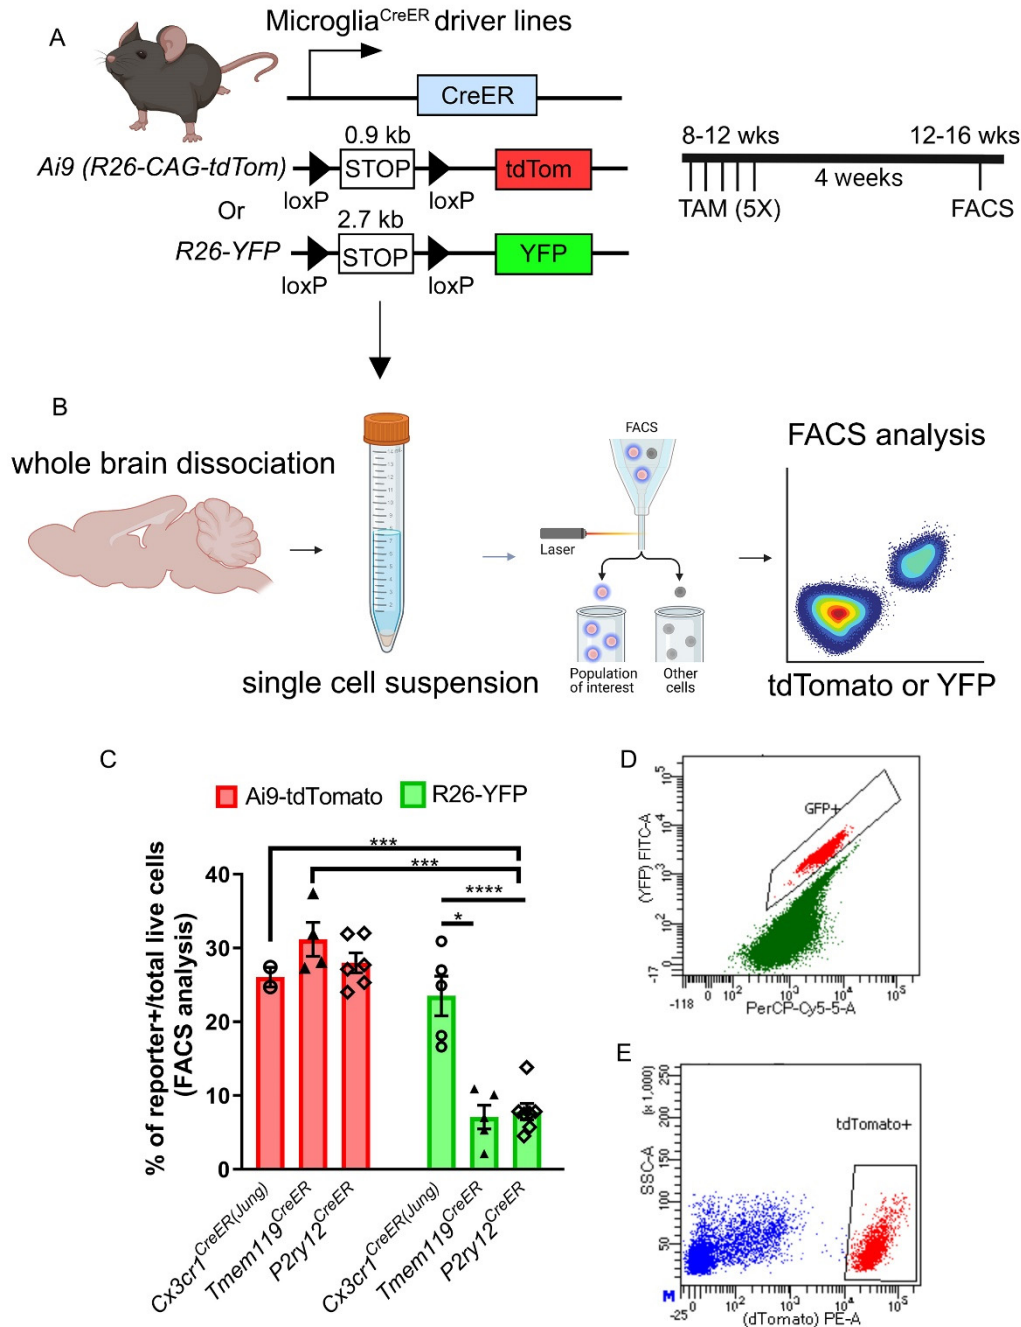

**Supplementary Figure 2.** FACS analysis of reporter-positive cells in total brain single cell resuspension confirms the reporter recombination efficiency differences among the three investigated *CreER* lines. Related to Figure 1. tdTomato<sup>+</sup> cell percentage from all three different lines show similar high-efficiency recombination and the YFP<sup>+</sup> cells show higher recombination efficiency in the *Cx3cr1*<sup>CreER(Jung)</sup>-*R26-YFP* mice but significantly lower recombination efficiency in the *P2ry12*<sup>CreER</sup>-*R26-YFP* mice and *Tmem119*<sup>CreER</sup>-*R26-YFP* line. Each data point represents data from one animal. mean±SEM \**p* < 0.05, \*\*\**p* < 0.001, and \*\*\*\**p* < 0.0001 for Two-way ANOVA analysis, Tukey post-hoc pairwise analysis. Data were combined from 2-3 independent cohorts of mice for each line.

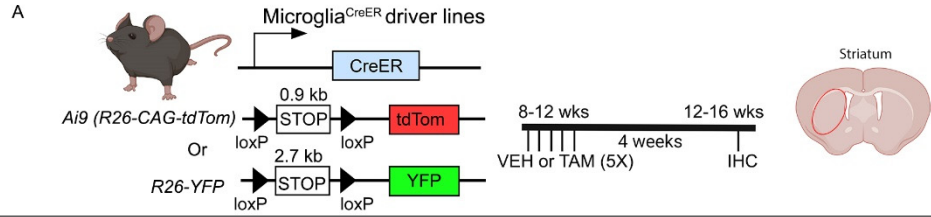

**Striatum**

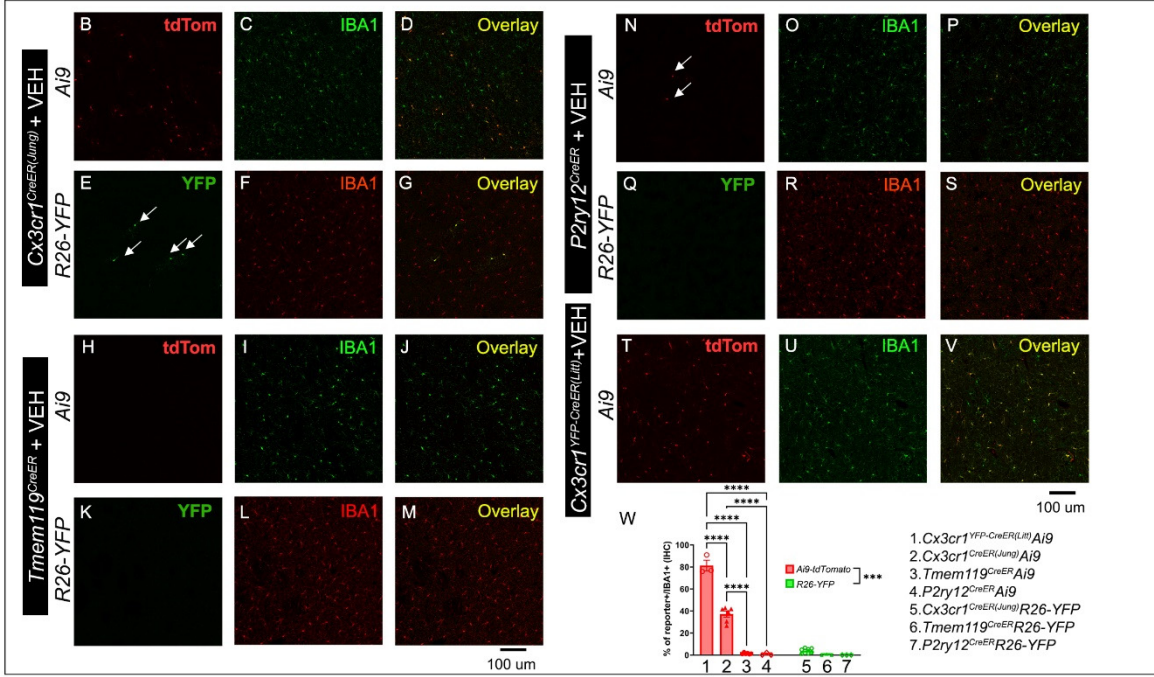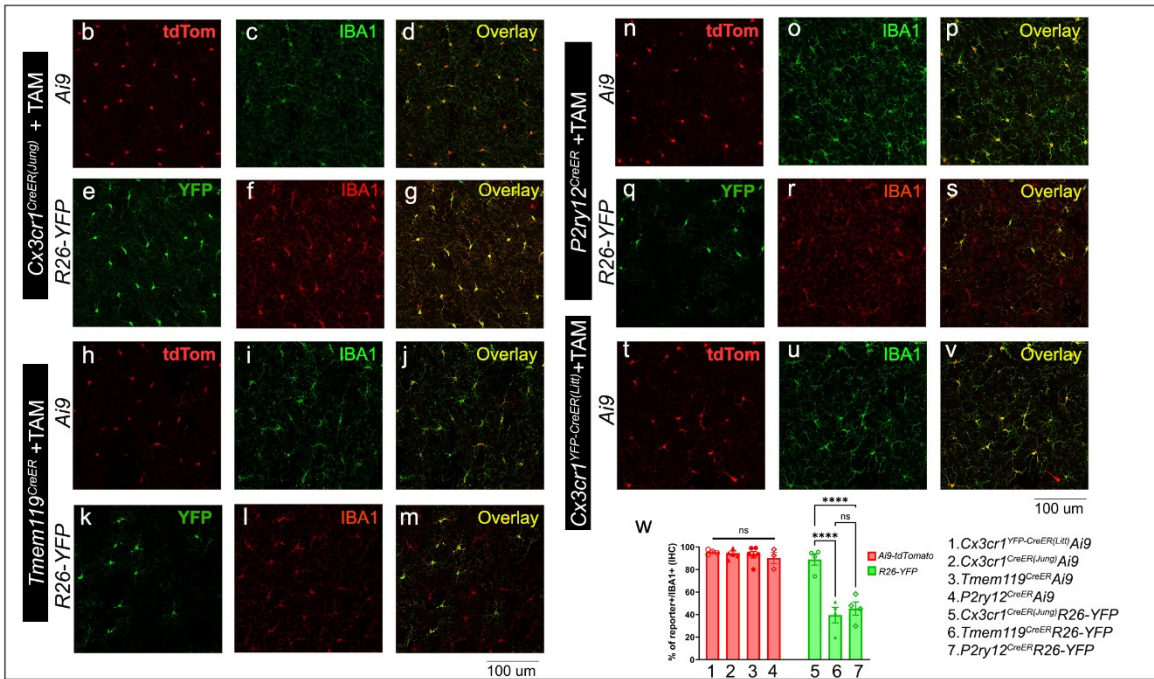

**Supplementary Figure 3.** Evaluation of the TAM-independent leakiness and the efficiency of TAM-dependent cre recombination in the four different *CreER* driver lines using either the *Ai9* (tdTomato) or *R26-YFP* reporter mouse lines in the striatum. Related to Figure 1. The experimental timeline is shown in panel (A). Representative images from each cre driver and reporter line (B-V for VEH treatment and b-v for TAM treatment). Cre driver and the reporter line are indicated on the left side of the panels. Quantification of reporter<sup>+</sup> cells in the IBA1<sup>+</sup> populations in the brain is shown in panel W (for VEH treatment) and w (for TAM treatment). Representative images are taken from the striatal region which reflects the general and homogenous trend in the whole parenchyma. Each data point represents the average of 1 animal (the average for each animal is obtained by quantifying multiple brain sections at similar anatomical locations) and the average for each animal was used as a single data point for statistical analysis. mean±SEM \*\*p < 0.01 and \*\*\*p < 0.001, for Two-way ANOVA analysis, Tukey post-hoc pairwise analysis. *Ai9* vs *R26-YFP* is significantly different as a factor (p<0.001). Data were combined from 2 independent cohorts of mice. Scale bar: 100 μm. Compared to the two *Cx3cr1<sup>CreER</sup>* lines (Littman and Jung), *Tmem119<sup>CreER</sup>* and *P2ry12<sup>CreER</sup>* show less leakiness in the absence of TAM but a decreased recombination efficiency and mosaic recombination in microglia.

A

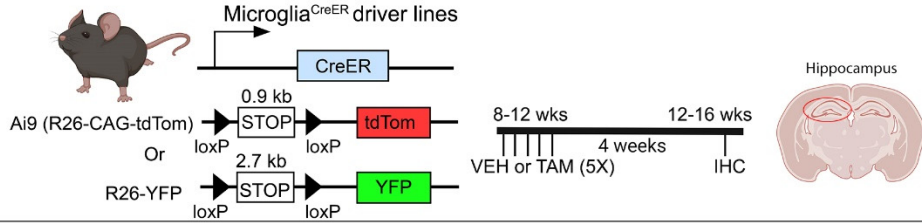

Hippocampus

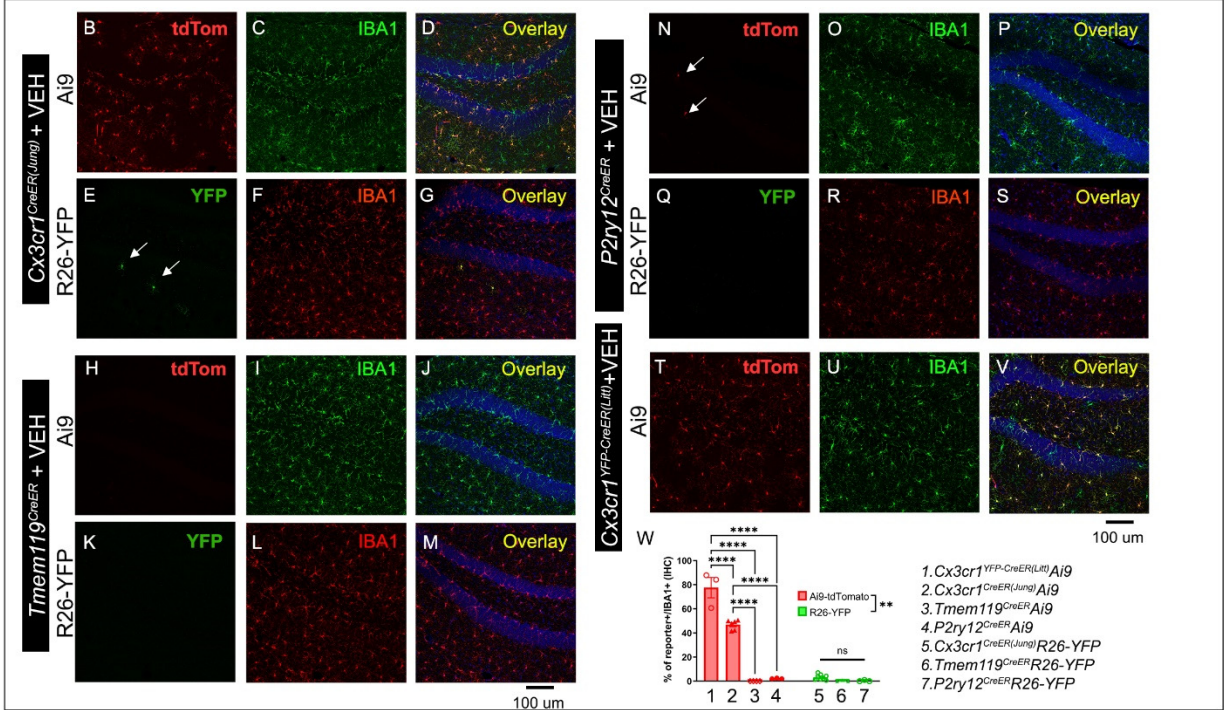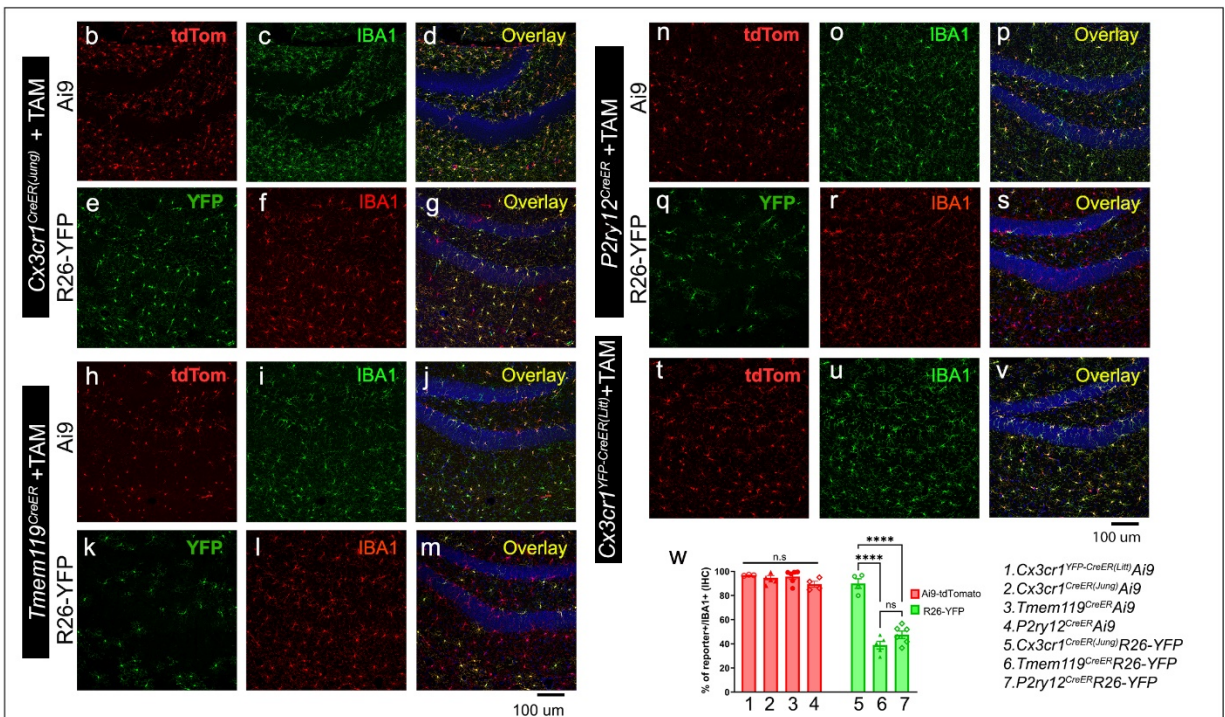

**Supplementary Figure 4.** Evaluation of the TAM-independent leakiness and the efficiency of TAM-dependent cre recombination in the four different *CreER* driver lines using either the *Ai9* (tdTomato) or *R26-YFP* reporter mouse lines in the hippocampus. Related to Figure 1. The experimental timeline is shown in panel (A). Representative images from each cre driver and reporter line (B-V for VEH treatment and b-v for TAM treatment). Cre driver and the reporter line are indicated on the left side of the panels. Quantification of reporter<sup>+</sup> cells in the IBA1<sup>+</sup> populations in the brain is shown in panel W (for VEH treatment) and w (for TAM treatment). Representative images are taken from the hippocampal region which reflects the general and homogenous trend in the whole parenchyma. Each data point represents the average of 1 animal (the average for each animal is obtained by quantifying multiple brain sections at similar anatomical locations) and the average for each animal was used as a single data point for statistical analysis. mean±SEM \*\*p < 0.01 and \*\*\*p < 0.001, for Two-way ANOVA analysis, Tukey post-hoc pairwise analysis. *Ai9* vs *R26-YFP* is significantly different as a factor (p<0.001). Data were combined from 2 independent cohorts of mice. Scale bar: 100 μm. Compared to the two *Cx3cr1<sup>CreER</sup>* lines (Littman and Jung), *Tmem119<sup>CreER</sup>* and *P2ry12<sup>CreER</sup>* show less leakiness in the absence of TAM but a decreased recombination efficiency and mosaic recombination in microglia.

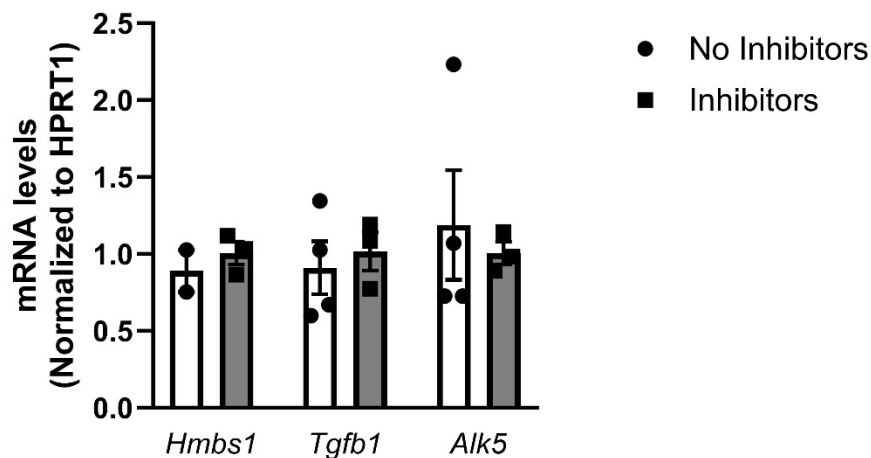

**Supplementary Fig 5.** The addition of transcriptional and translational inhibitors during the cell isolation process does not affect the expression level of *tgfb1* or *Alk5* mRNA in sorted microglia. Related to Figure 3. Microglia were sorted either in the presence or absence of inhibitors and the mRNA levels for 2 housekeeping genes (*Hprt1* and *Hmbs1*), *Tgfb1* and *Alk5* were analyzed with qRT-PCR. mean±SEM. P>0.05, Student's t-test between two groups for all genes.

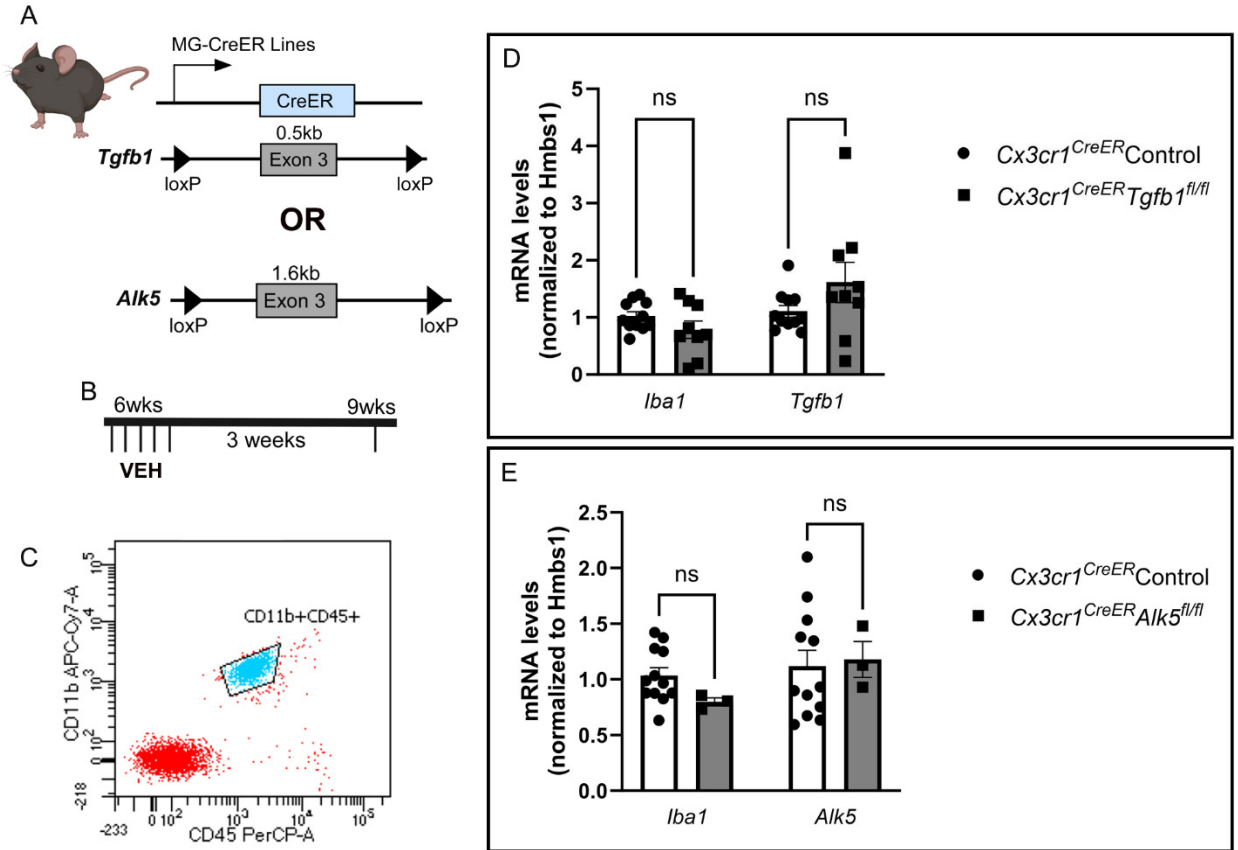

**Supplemental Figure 6:** qRT-PCR analysis of FACS sorted brain myeloid cells (CD11b<sup>+</sup>/CD45<sup>int</sup>) from *Cx3cr1*<sup>CreER(Jung)</sup> driver line to examine tamoxifen-independent gene recombination of the floxed target genes. Related to Figure 3. Using a small (*Tgfb1*, 0.5kb) and a large (*Alk5*, 1.6kb) floxed region mouse lines, we did not observe any tamoxifen-independent reduction in mRNA levels in either the floxed *Tgfb1*<sup>fl/fl</sup> or the *Alk5*<sup>fl/fl</sup> in the total sorted microglia in the absence of TAM treatment in *Cx3cr1*<sup>CreER(Jung)</sup> *Tgfb1*<sup>fl/fl</sup> or the *Cx3cr1*<sup>CreER(Jung)</sup> *Alk5*<sup>fl/fl</sup> mice. mean±SEM. P>0.05, Student's t-test for all genes.



| Table 1. Double reporter labeling of <i>P2ry12<sup>CreER</sup>(mut/WT) Ai9-R26-YFP</i> mice after TAM                                   |          |          |          |          |
|-----------------------------------------------------------------------------------------------------------------------------------------|----------|----------|----------|----------|
| Cell Condition                                                                                                                          | Mouse 1  | Mouse 2  | Mouse 3  | Average  |
| % of total tdTomato <sup>+</sup>                                                                                                        | 77.77778 | 88.09524 | 81.69014 | 82.52105 |
| % of total YFP <sup>+</sup>                                                                                                             | 45.29915 | 35.71429 | 43.66197 | 41.55847 |
| % of YFP <sup>+</sup> :tdTomato <sup>-</sup>                                                                                            | 22.22222 | 11.90476 | 18.30986 | 17.47895 |
| % of YFP <sup>-</sup> :tdTomato <sup>+</sup>                                                                                            | 54.70085 | 64.28571 | 56.33803 | 58.44153 |
| % of YFP <sup>+</sup> :tdTomato <sup>+</sup>                                                                                            | 23.07692 | 23.80952 | 25.35211 | 24.07952 |
| *All percentages are calculated by dividing the number of each category of cells by the total reporter positive cells from each animal. |          |          |          |          |

Supplemental Table 1. Quantification of the FACS analysis of the reporter<sup>+</sup> microglia in whole brain single cell suspension prepared from the *P2ry12<sup>CreER</sup>(mut/WT) Ai9-R26-YFP* mice after TAM treatment.
